# Supplementary material for: Functional outcomes of extended-release methylphenidate and atomoxetine in children: retrospective chart analysis
Source: Springer Nature journal article supplement (doi:10.1186/s41983-022-00532-3), 2022-08-19
Supplement: MOESM2 [file 25672136]

# Data Abstraction Form

**Study type:** Retrospective Chart Review

**Recruitment Area:** Samsun Mental Health Hospital

**Recruitment Date:** (Between May 2019-May 2021)

**Accept/rejected**

**Reason for rejection:**

Based on exclusion criteria

Missing data

Non-adherence or non-compliance with titration Schedule

Drop-out

Stopping treatment

Switching the medication

Adverse Events

**Inclusion criterias:**

**Age:** 6-14 years

**Diagnosis of ADHD** (CGI score  $\geq 3$  or T-DSM-IV-S score  $> 32$ )

**Pharmacotherapy:** OROS-MPH or ATX (exclude if the patient uses the combination of any form of MPH and ATX)

**Exclusion criterias:**

Comorbidity other than ODD and CD

Chronic medical illnesses

## Data of the sample to fulfill:

### a) Descriptives;

Age:                      Sex:                      Hollingshead Index Score:  
ADHD subtype:                      Comorbidity: ODD, CD or Both  
Medication: OROS-MPH or ATX                      Medication: AP, AD or Both

### b) T-DSM-IV scores: (Missing data on any items were not allowed)

Total score:

Inattention:                                              Hyperactivity/impulsivity:

Oppositional-defiance:                                              Conduct disorder:

**c) WFIRS scores:** (Maximum 1 item on a domain and 10% on the whole scale were allowed to missing data and calculation of index score were made as the sum-score divided by the items completed.)

Total:

Family:

School:                      Learning:                      Behaviour:

Life skills:

Self-concept:

Social activities:

Risky activities

**d) Adherence:** Yes/No (Adherent if he had taken medication at least 80% of the time.)
